# Supplementary material
Source: PubMed Central journal article supplement (PMC4896091)
Supplement: NIHMS771155-supplement-supp_info.pdf [file NIHMS771155-supplement-supp_info.pdf]

**Supplementary Figure - Uncropped scans with size marker indications**

**Fig4a**

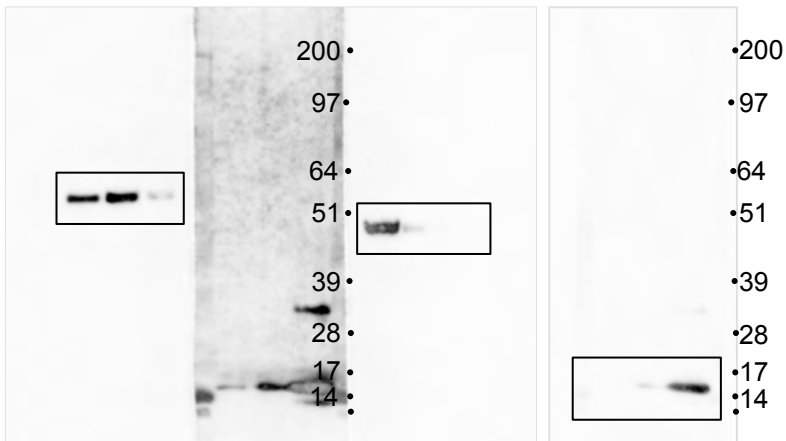

**Ext. Data 3j**

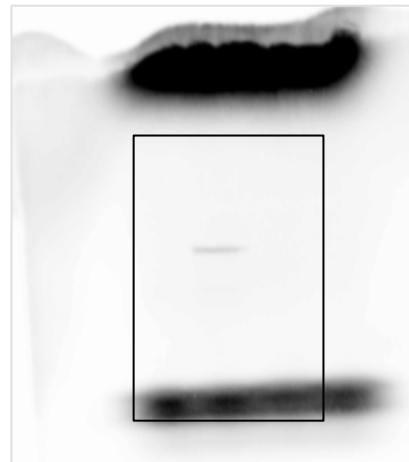

**Ext. Data 6c**

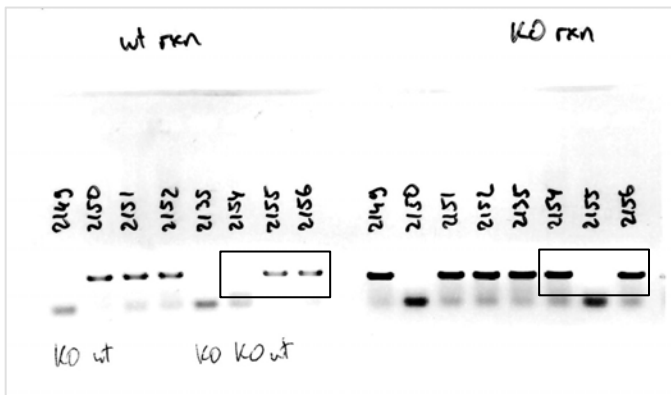

**Ext. Data 7b**

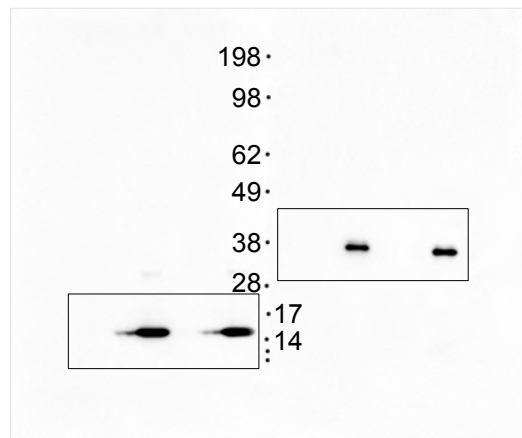

**Ext. Data 7c**

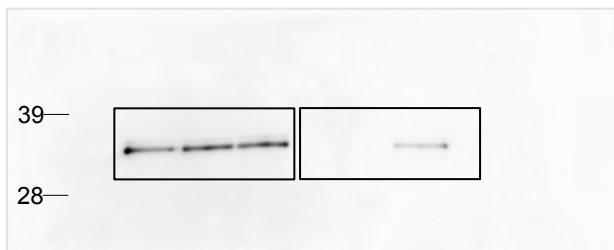

**Ext. Data 7f**

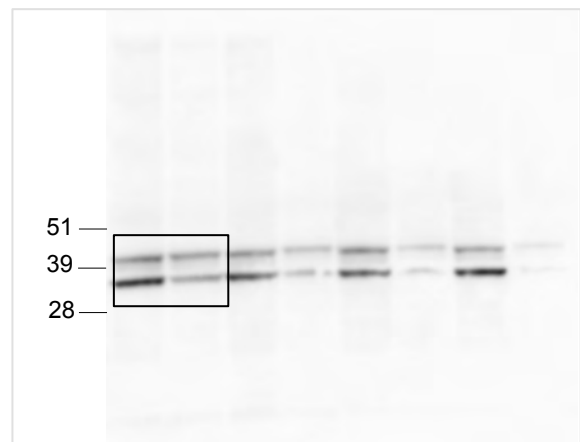

## Chirp Probe Sets

| LacZ probe set 1 (5'→3') |
|--------------------------|
| CCAGTGAATCCGTAATCATG     |
| AATGTGAGCGAGTAACAACC     |
| AATTCAGACGGCAAACGACT     |
| GCTGATTTGTGTAGTCGGTT     |
| TTTCGACGTTTCAGACGTAGT    |
| TTCATCAGCAGGATATCCTG     |
| AGACGATTCATTGGCACCAT     |
| TTTGATGGACCATTTTCGGCA    |
| ATACAGAACTGGCGATCGTT     |
| TTTACCTTGTGGAGCGACAT     |
| TGTGAAAGAAAGCCTGACTG     |

| LacZ probe set 2 (5'→3') |
|--------------------------|
| ATTAAGTTGGGTAACGCCAG     |
| AATAATTCGCGTCTGGCCTT     |
| ATCTTCCAGATAACTGCCGT     |
| AACTGTTACCCGTAGGTAGT     |
| ACCATTTTCAATCCGCACCT     |
| TGGTTCGGATAATGCGAACA     |
| ATTTGATCCAGCGATACAGC     |
| AAACGGGGATACTGACGAAA     |
| TATTCGCTGGTCACTTCGAT     |
| AAATCCATTTTCGCTGGTGGT    |
| TACGCCAATGTCGTTATCCA     |

| LeXis probe set 1 (5'→3') |
|---------------------------|
| TAGCTTCTCGCTCGAATGTG      |
| CTAGTTGTTAGATCCGGCTC      |
| AGCATTGTCCAAC TTCAGAG     |
| AGTTTCC TAGAGCAAAGCC      |
| ATGGGAACCACCAGGGAACG      |
| TTCC TCATCTTCATAAGGGA     |
| TTGTGCTAGATTCAGCATGT      |
| GCTTGTGATTAGCTCAGTAT      |
| CCGATAATTCAAGGACTCCA      |
| CACAACAATGGAGTGGCCAA      |
| GGCAAGATGCTATTGAAGCA      |

| LeXis probe set 2 (5'→3') |
|---------------------------|
| AACTGGAGTGTTGTTTGCAC      |
| CGGTAGGTAGGGGCTTGAAC      |
| TATTCTGTTTGCACCTGTTG      |
| AAGGCAAAGCCTAGCAATGG      |
| CTTCCATCATTGGTTCTCTC      |
| GGTGTATCTGTATTTCTCC       |
| CATTGGTCAAATGCGTTCTC      |
| GGTTGAGCAGGTTTTTCTAA      |
| CTGGGGAACTGTGGAAGTAT      |
| TTGGTTTGAGAGGTGTCATC      |
| AATTGTCTTTGCTTTTGTCC      |

## Chip Primers

| Gene  | Forward (5'→3')       | Reverse (5'→3')       |
|-------|-----------------------|-----------------------|
| Abca1 | GGGGAAAGAGGGAGAGAACAG | GAATTACTGGTTTTTGGCCG  |
| LeXis | GCACAAGACTCGAGAGGGTCA | AAGAAGATGGCTGCCTGGAAC |
| Mapk1 | GGGCTACACAGAGGAGAAGG  | GCTCTGGTAGGGGTGTGATT  |
| Sreb2 | GGCGTTCTGGAGACCAT     | CACTCACCGTCGATGTCC    |
| Hmcr  | CATCTCTCACCACGGCAGA   | CAGGTCAAACCTCTGAGTTCC |
| Cyp51 | GACCTGAGGAAGCAGGCTC   | ACCAATCTGGTCTGAGATC   |
| Fdps  | AGACCACTACCACTCCGG    | GTCTACAGTGAGAGTTCC    |

## Probes for single molecule RNA FISH

---

### LeXis (5'→3')

AACTGGAGTGTTGTTTGCAC  
CGGTAGGTAGGGGCTTGAAC  
TATTCTGTTTGCACCTGTTG  
CCTCGTATGTAGTTTCTAG  
GCAAAGCCTAGCAATGGATA  
AGAGCCATCCAAGTATCTCT  
GTCTTGACTTGCTTTTCTCTT  
AATGGGAACCACCAGGGAAC  
TTCCTCATCTTCATAAGGGA  
TTCAGCATGTCCTTTAAGGT  
CCAGTAAGTGATGGTAGAGG  
TGCTTGATGATTAGCTCAGTA  
CAGGTTTTTCTAAGCAGCTT  
GGAAGTATCCTCCGATAATT  
CACAACAATGGAGTGGCCAA  
GTTTGTATTTTCTTGTGGT  
AATTGTCTTTGCTTTTGTCC  
TCATTTTTACAGCTCACTGA

---

---

### LeXis (5'→3')

TAGCTTCTCGCTCGAATGTG  
CTAGTTGTTAGATCCGGCTC  
AGCATTGTCCAACCTCAGAG  
GACAAAGCCCGGTCAAACAG  
CACTCTTAATAGCATTTCCA  
AGTTCATGAGTGGGCAGGAA  
CTTTTCTTTTGCCTTTTATA  
TTGCATGTGTGTGCCAACTC  
CTTCCATCATTGGTTCTCTC  
TTATCTGTATTTCTCCCTGG  
CTTCCAATCCATTGTGCTAG  
CTCATTGGTCAAATGCGTTC  
TTCTTCTCCAGGAATGTCTA  
AGGACTCCATAATAGGTTGA  
TCACTGGACCTGGGGAACCTG  
GAGAGGTGTCATCATTCTGA  
GGCAAGATGCTATTGAAGCA

---

## Knockdown RNA Sequences

| sh            | Primers                                                                                                                       |
|---------------|-------------------------------------------------------------------------------------------------------------------------------|
| <b>LeXis1</b> | 5' - CACCGGTCTCTGAAGTTGGACAATGCGAACATTGTCCAACCTTCAGAGACC -3'<br>5' - AAAAGGTCTCTGAAGTTGGACAATGTTTCGCATTGTCCAACCTTCAGAGACC -3' |
| <b>LeXis8</b> | 5' - CACCGAGAGAACCAATGATGGAAGGCGAACCTTCCATCATTGGTTCTCTC -3'<br>5' - AAAAGAGAGAACCAATGATGGAAGGTTTCGCCTTCCATCATTGGTTCTCTC -3'   |
| <b>Raly</b>   | 5' - CACCGCAATGTTGGTGGTGGCAGCACGAATGCTGCCACCACCAACATTGC -3'<br>5' - AAAAGCAATGTTGGTGGTGGCAGCATTTCGTGCTGCCACCACCAACATTGC -3'   |

| ASO           | Sequence         |
|---------------|------------------|
| <b>LeXis1</b> | AAGTTCTTTACCTCTG |
| <b>LeXis2</b> | CAATAGTTTTGACTCT |
| <b>LeXis3</b> | CAGTTAGGGAATGCGG |
